# Supplementary material for: Mitochondrial fission protein 1 up-regulation ameliorates senescence-related endothelial dysfunction of human endothelial progenitor cells
Source: Springer Nature journal article supplement (doi:10.1007/s10456-019-09680-2), 2019-09-03

# Supporting Information

## Figure 1D

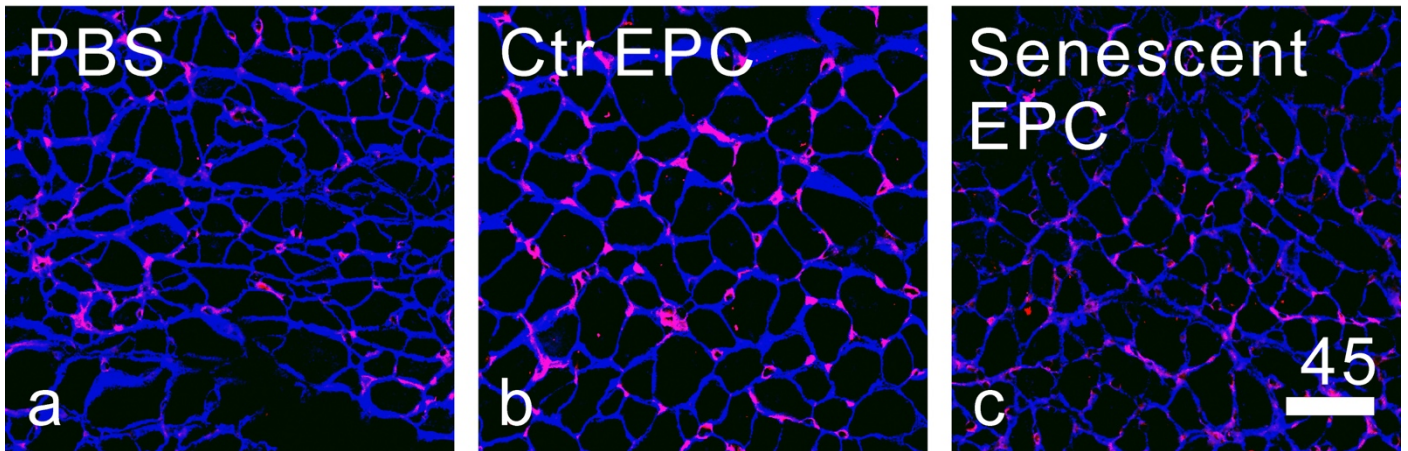

## Figure 2B VDAC/Actin

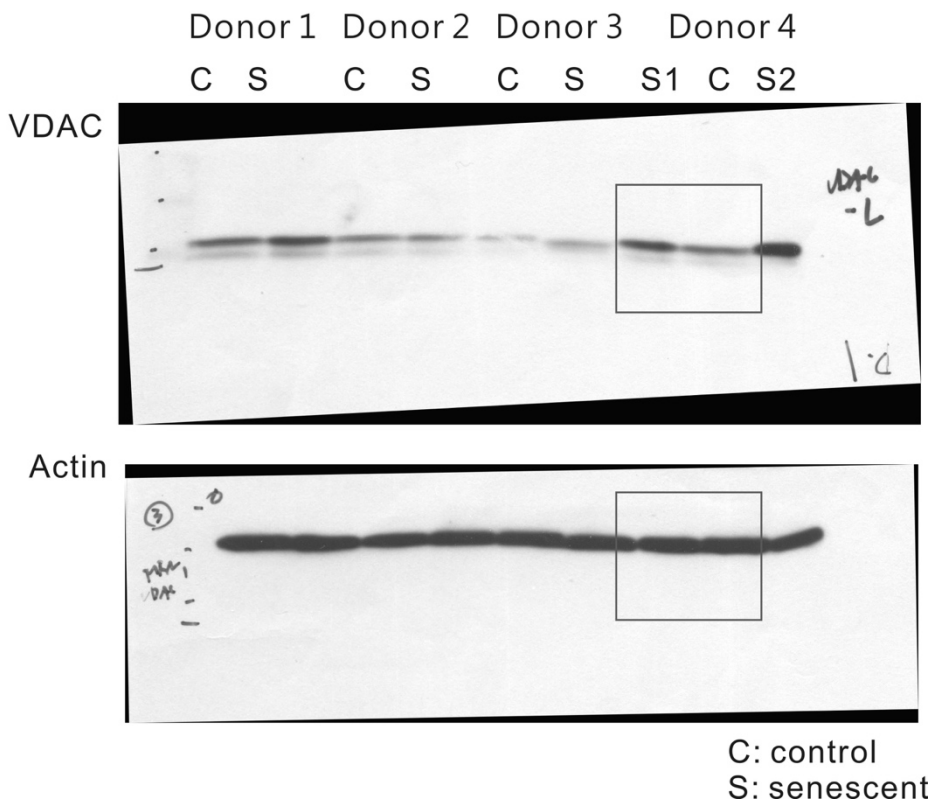

# Figure 4E Fis1/Actin

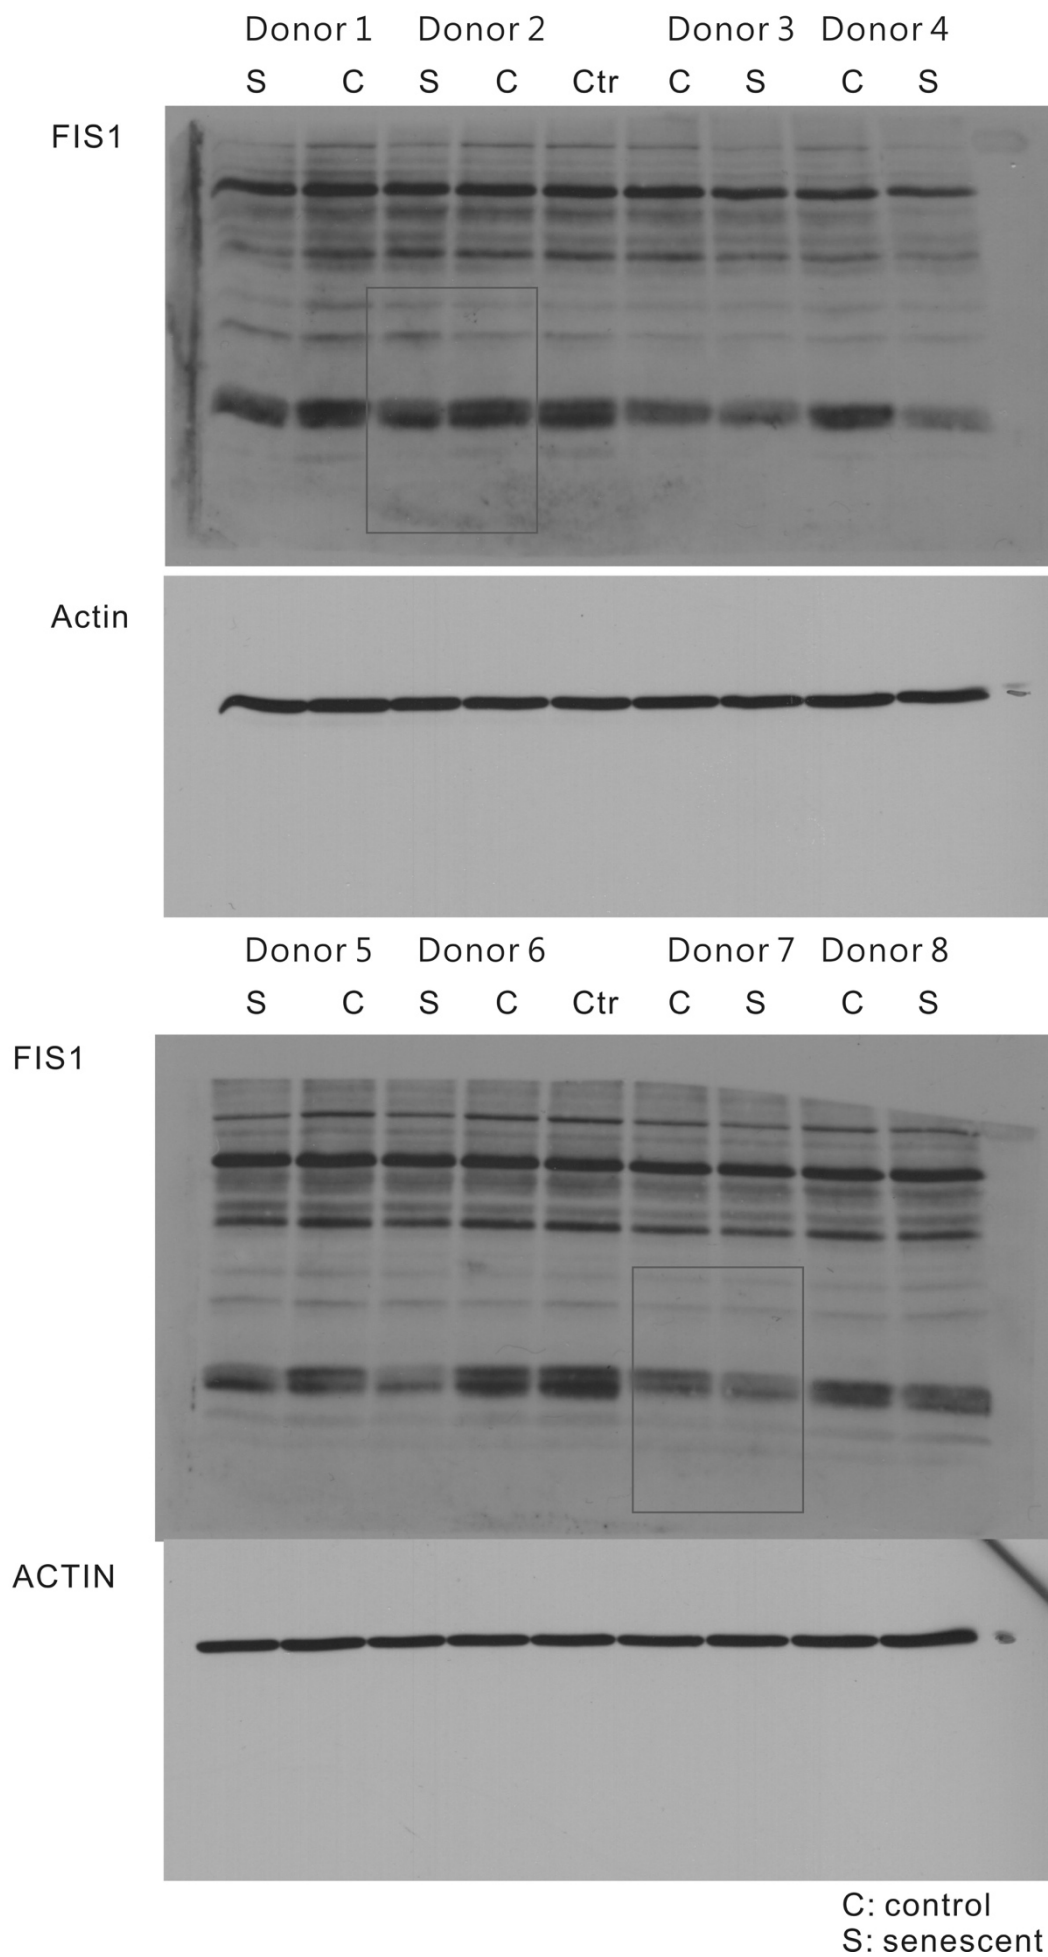

# Figure 4E MFN1/MFN2/Actin

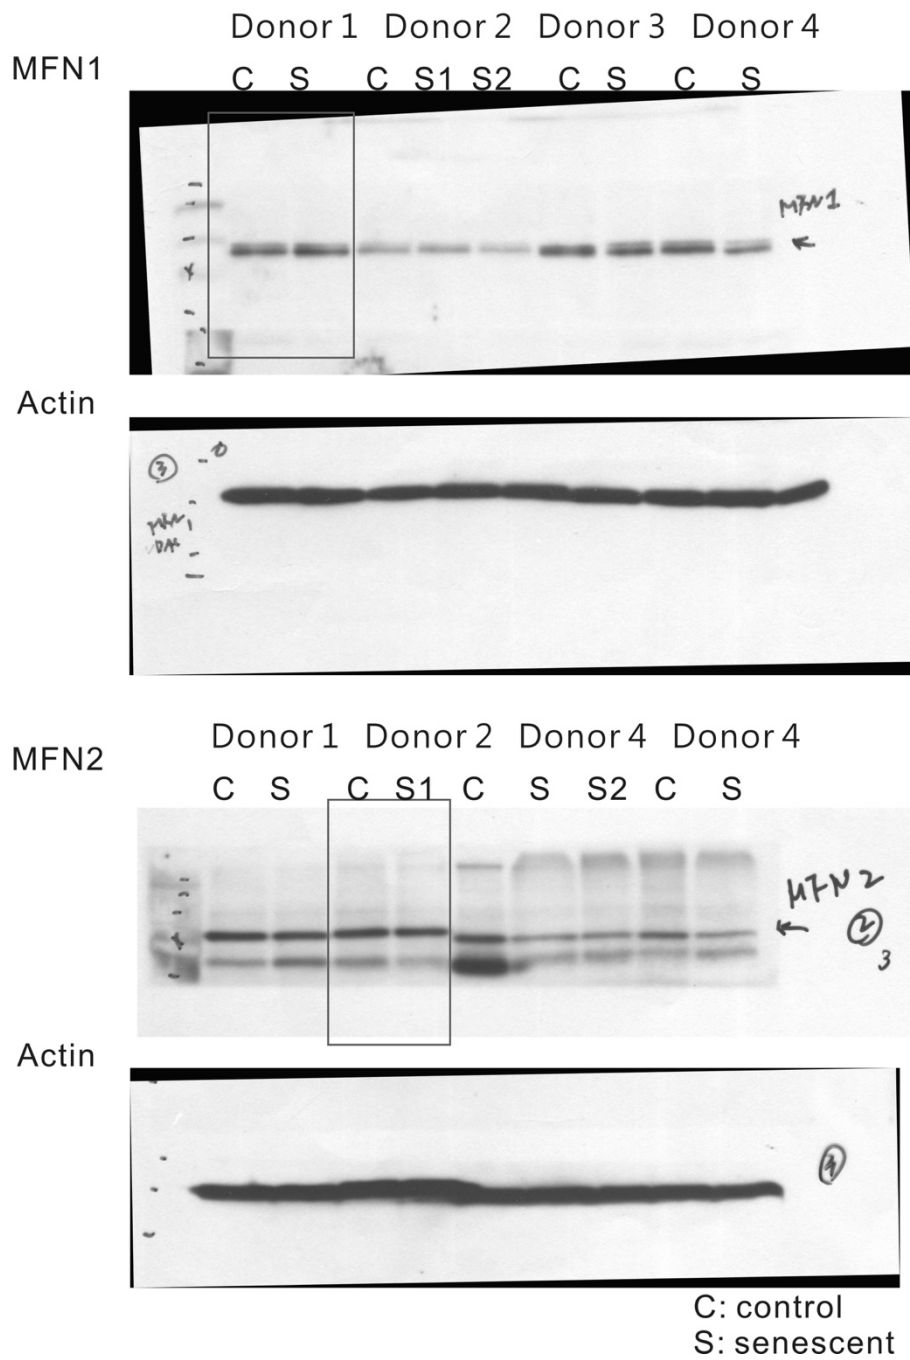

# Figure 4E Drp1/OPA1/Actin

Drp1

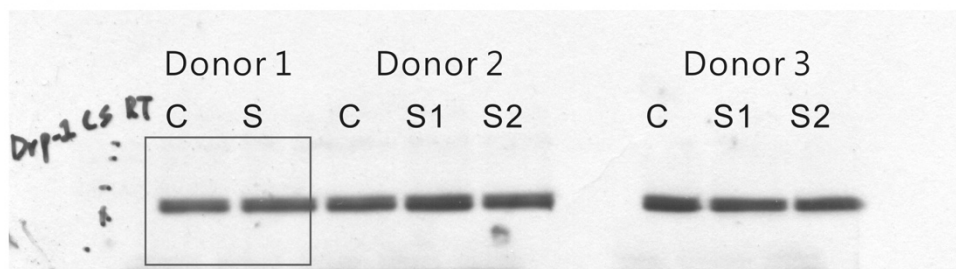

Actin

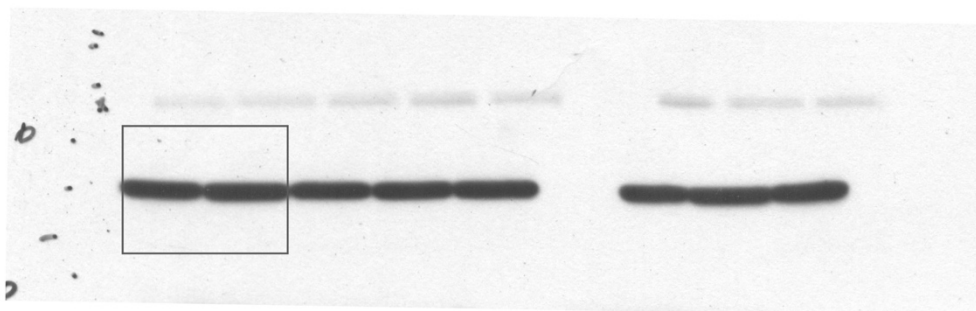

OPA1

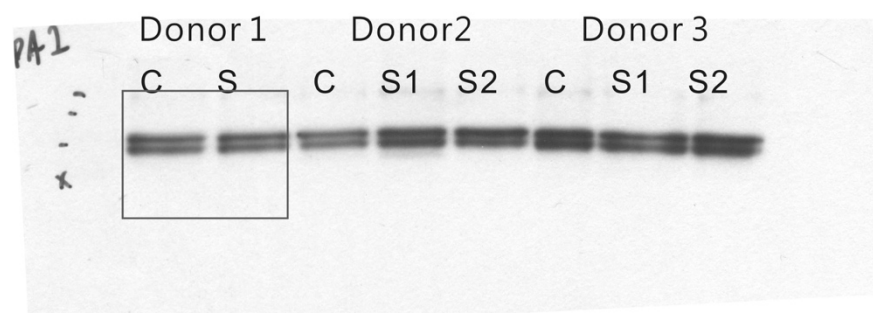

Actin

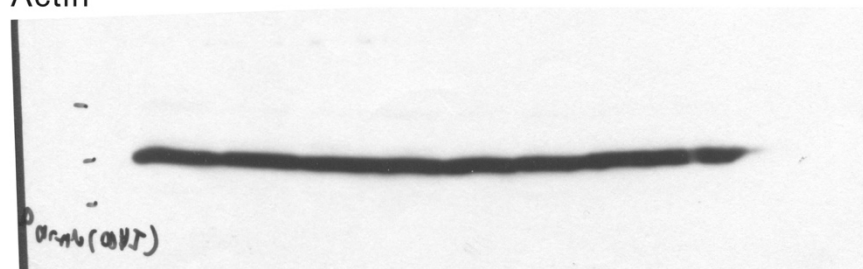

C: control  
S: senescent

# Figure 4E Mff/Actin

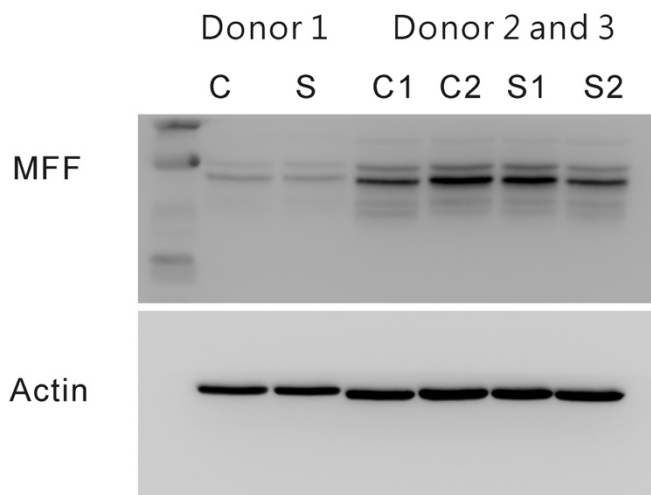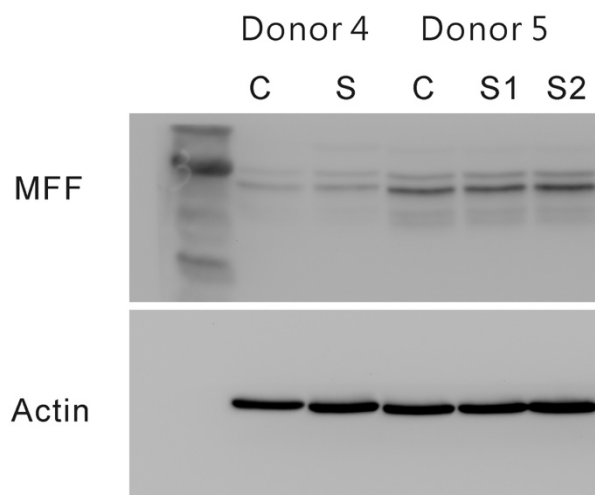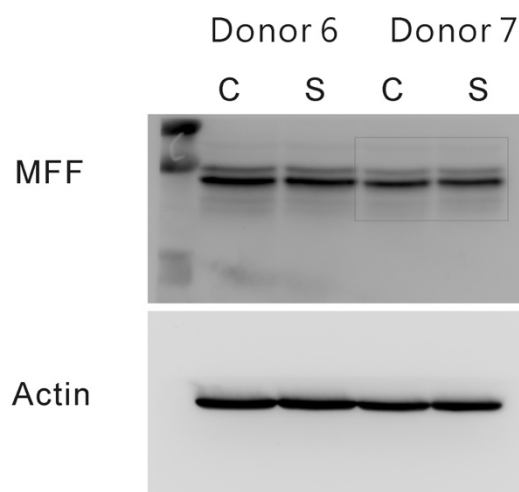

# Figure 4F Fis1/GAPDH

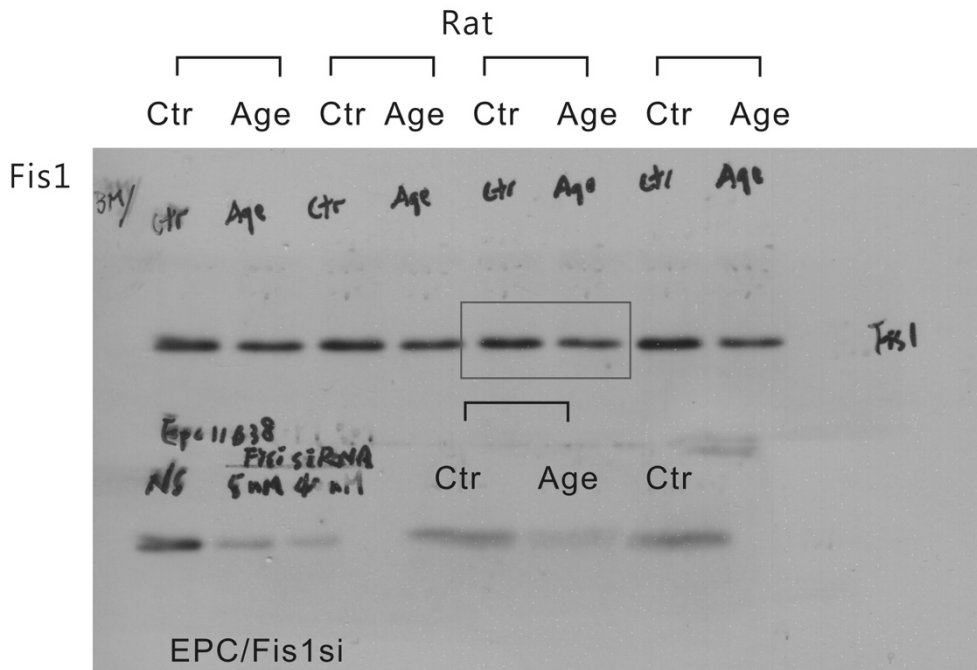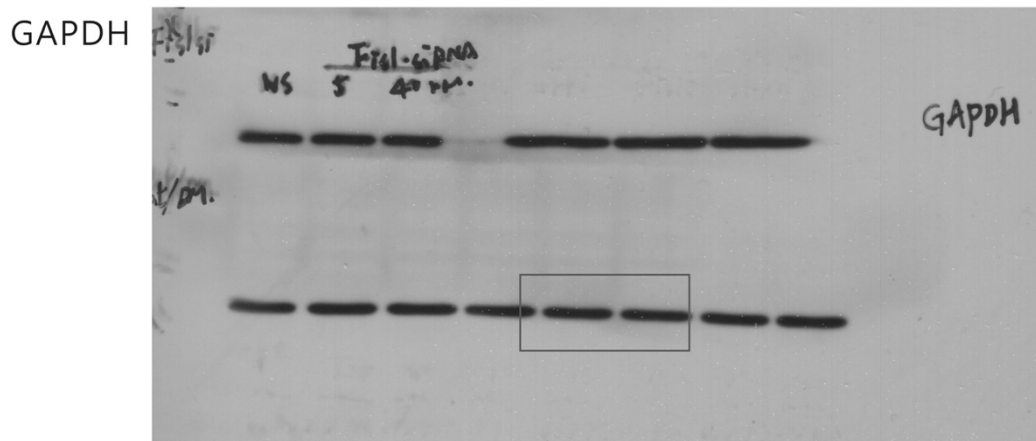

Ctrl: 3 months  
Age: 24 months

# Figure 5A SirT1/Actin

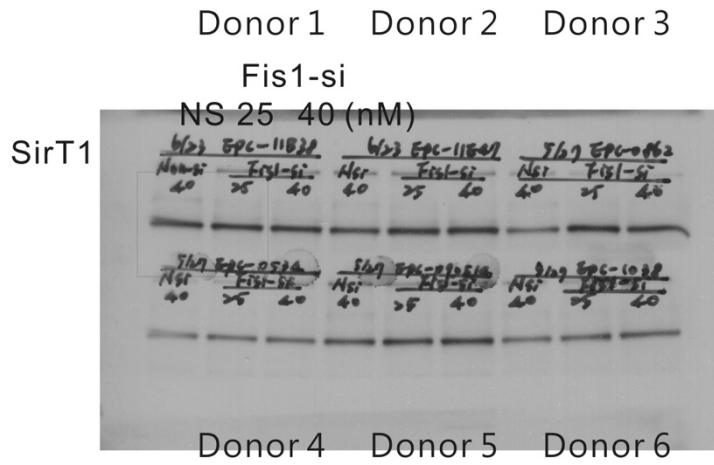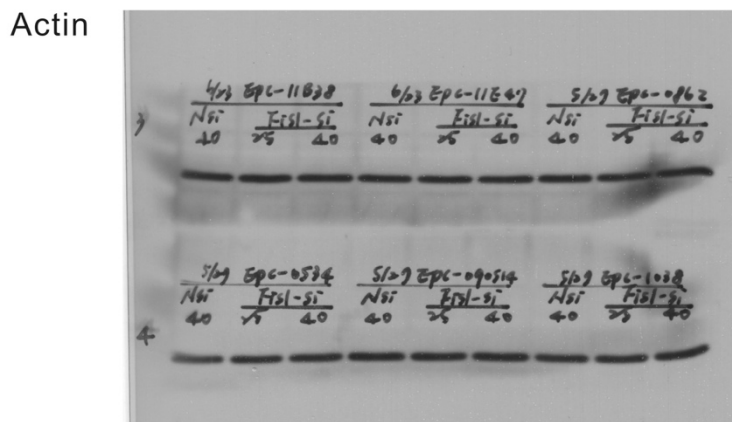

# Figure 5A Fis1/Actin

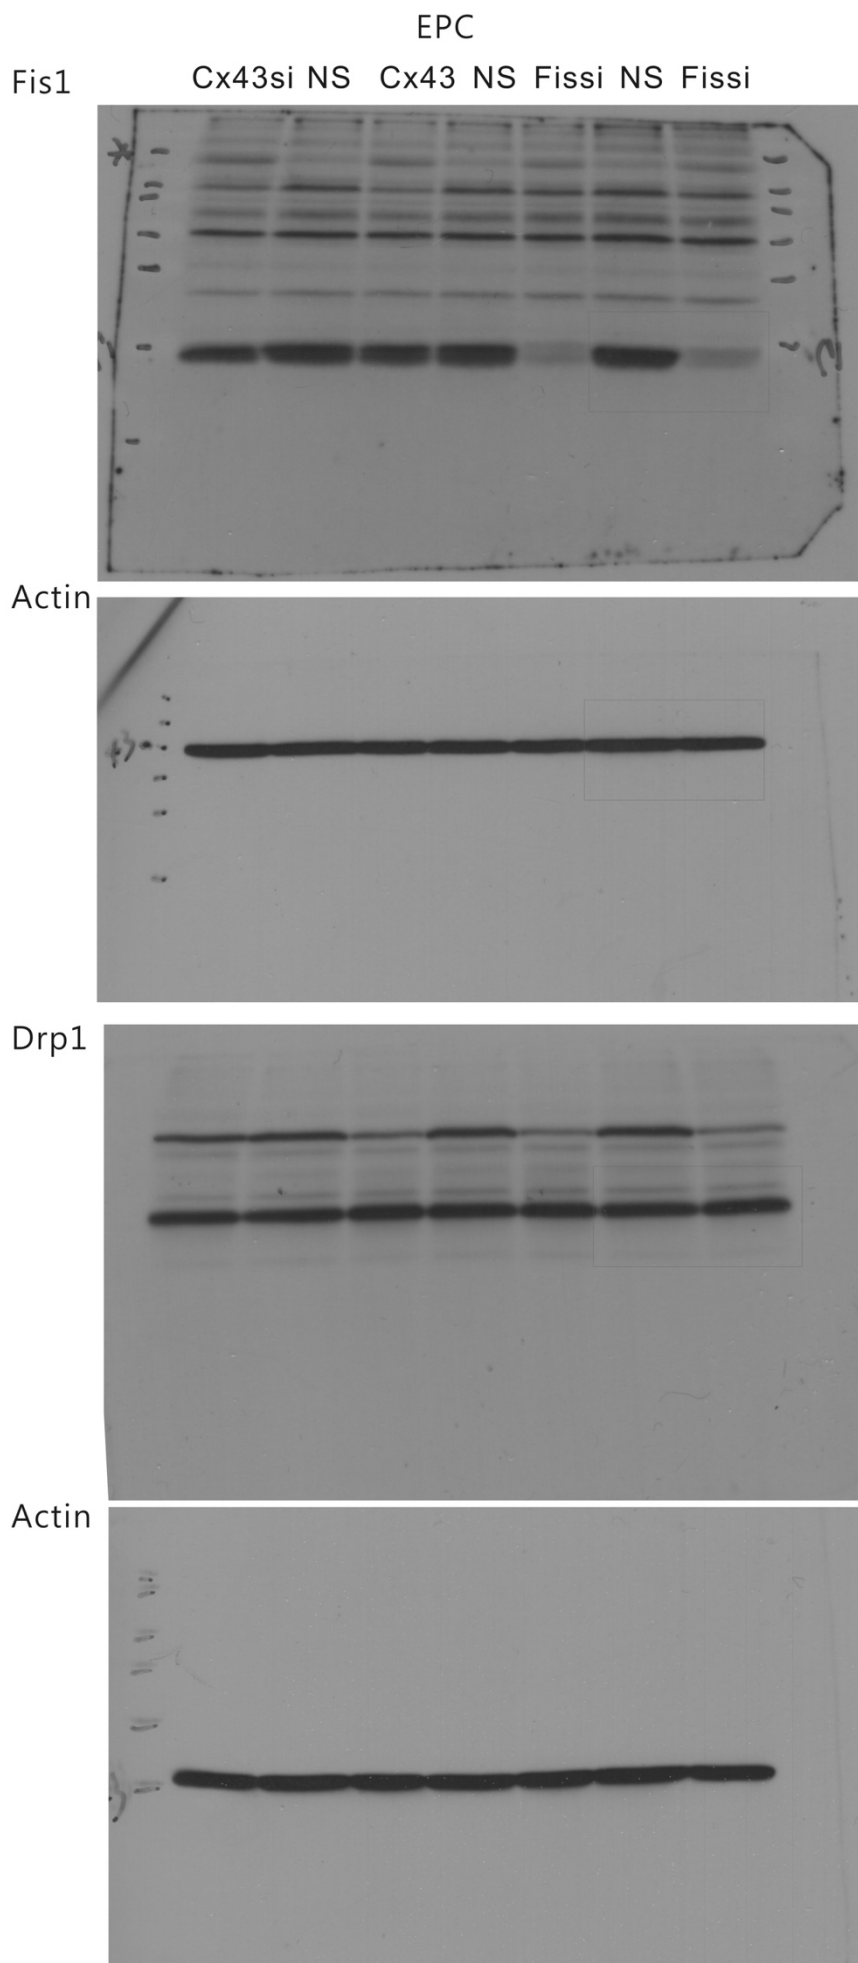



Figure 6I

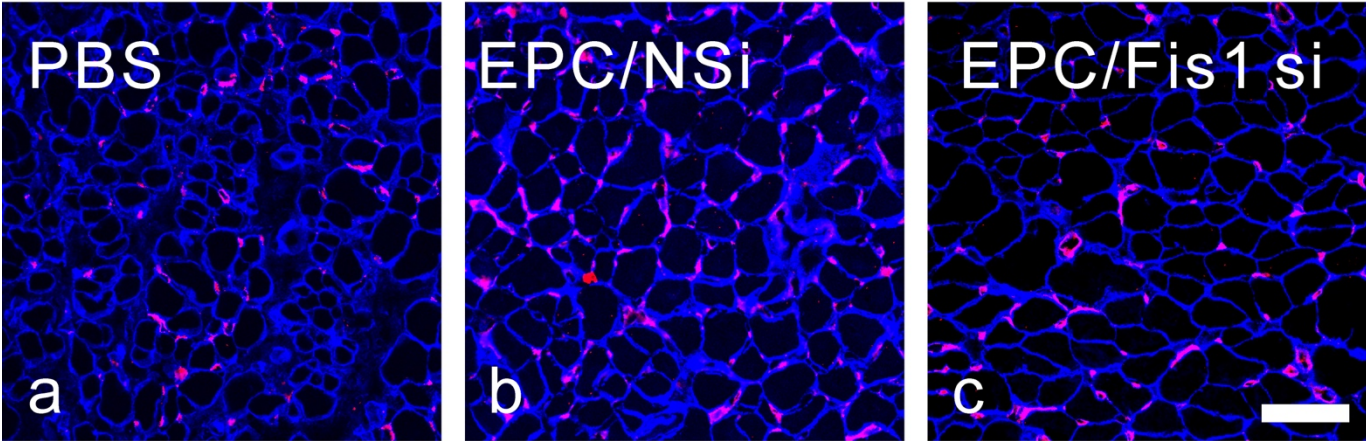

Supplement: 10456_2019_9680_MOESM2_ESM.pdf [file 10456_2019_9680_MOESM2_ESM.pdf]
